# Supplementary material
Source: publisher figshare collection journal article supplement (https://tandf.figshare.com/articles/dataset/_/24159618)
Supplement: Supplementary file 1 [file 1]

**Supporting information for: BIJP-2022-043 R1**

**Non-conventional, Burnt *Shorea robusta* Leaf Extract Mediated Green Synthesis of Zinc Oxide Nanoparticles and Facile Removal of Eriochrome Black T dye from water**

Md. Atif Qaiyum,a Priyanka Priyadarsini Samal, a Subhashri Dutta, a Banashree Dey, b

Soumen Dey a,*

a Environmental Protection Laboratory, Department of Chemistry, Central University of Jharkhand, Brambe, Ranchi-835205, India.

b Department of Chemistry, The Graduate School College for Women Jamshedpur, Jamshedpur-835205, India.

*Corresponding author: E-mail: [soumen.dey@cuj.ac.in](mailto:soumen.dey@cuj.ac.in), Orcid: 0000-0002-8296-553X

TGA and DTA analysis

The thermal stability of the synthesized ZnO NP was estimated. The obtained TGA curve is depicted in Fig S1 .It is seen in the figure that a minimal weight loss is obtained of 1.06% upto 350 °C which may be due to the loss of unrestrained volatile matter and associated water on the material. The second stage between 350-600 °C involves a weight loss of approx 2.50 % which may be due to restrained volatile product. Above 600 °C there is slight weight loss noticed till 800 °C. A total 3.65% weight loss is obtained when the sample was heated upto 800 °C. This reveals that the synthesized ZnO NP is thermally stable at elevated temperature.





Fig S1. (a) TGA curve for synthesized ZnO NP (b) DTA curve of ZnO
